# Supplementary material for: Gender Differences in Developing Biomarker-Based Major Depressive Disorder Diagnostics
Source: Int J Mol Sci. 2020 Apr 25;21(9):3039. doi: 10.3390/ijms21093039 (PMC7246841; doi:10.3390/ijms21093039)
Supplement: Supplementary file 1 [file ijms-21-03039-s001.zip]

Archive with 4 entries (4 files):
- Figure S1 Kaplan-Meier analysis of MDD status irrespective of day of sample drawing.pdf
- Table S1 Mann whitney U and levene test results.pdf
- Table S2 overview of biological mechanisms of MDD and associated biomarkers.pdf
- Table S3 Comparison of results with and without gender separation within new cohort .pdf
