# Supplementary material for: Gender Differences in Developing Biomarker-Based Major Depressive Disorder Diagnostics
Source: Int J Mol Sci. 2020 Apr 25;21(9):3039. doi: 10.3390/ijms21093039 (PMC7246841; doi:10.3390/ijms21093039)
Supplement: Supplementary file 1 [file ijms-21-03039-s001.zip › Table S1 Mann whitney U and levene test results.pdf]

Supplementary Table S1a. Mann Whitney U and Levene's test results for gender MDD vs controls

|                          |        | <i>p</i> value      |               |                     |               |
|--------------------------|--------|---------------------|---------------|---------------------|---------------|
|                          |        | Men (N = 200)       |               | Woman (N = 200)     |               |
| Biomarkers               | Matrix | Mann-Whitney U test | Levene's test | Mann-Whitney U test | Levene's test |
| Aldosterone              | Urine  | 0.051               | 0.656         | 0.757               | 0.673         |
| <b>α1 anti-trypsin</b>   | Serum  | 0.248               | 0.086         | 0.154               | 0.345         |
|                          | Urine  | 0.191               | 0.037*        | 0.414               | 0.601         |
| <b>Apolipoprotein A1</b> | Serum  | 0.64                | 0.016*        | 0.439               | 0.613         |
| BDNF free                | Serum  | 0.219               | 0.093         | 0.234               | 0.41          |
| <b>BDNF total</b>        | Serum  | 0.187               | 0.011*        | 0.27                | 0.946         |
| <b>Calprotectin</b>      | Serum  | 0.016 *             | 0.076*        | 0.0001 **           | 0.201         |
|                          | Urine  | 0.094 *             | 0.498         | 0.092               | 0.041 *       |
| <b>cGMP</b>              | Urine  | 0.024 *             | 0.014*        | 0.187               | 0.498         |
| <b>Cortisol</b>          | Serum  | 0.119               | 0.138         | 0.126               | 0.331         |
|                          | Urine  | 0.005 **            | 0.077         | 0.569               | 0.939         |
| <b>EGF</b>               | Serum  | 0.008 **            | 0.045*        | 0.24                | 0.967         |
| Endothelin               | Serum  | 0.968               | 0.774         | 0.218               | 0.272         |
| <b>HVEM</b>              | Urine  | 0.0001 **           | 0.165         | 0.0001 **           | 0.003 **      |
| <b>Isoprostane</b>       | Urine  | 0.132               | 0.692         | 0.003 **            | 0.034 *       |
| <b>Leptin</b>            | Serum  | 0.485               | 0.28          | 0.017 *             | 0.003 **      |
|                          | Urine  | 0.206               | 0.412         | 0.209               | 0.221         |
| LTB4                     | Urine  | 0.239               | 0.154         | 0.331               | 0.184         |
| Midkine                  | Urine  | 0.734               | 0.805         | 0.827               | 0.678         |
| <b>Myeloperoxidase</b>   | Serum  | 0.3                 | 0.589         | 0.011 *             | 0.081         |
|                          | Urine  | 0.373               | 0.381         | 0.164               | 0.167         |
| <b>Prolactin</b>         | Serum  | 0.001 **            | 0.111         | 0.95                | 0.702         |
| <b>Resistin</b>          | Serum  | 0.023 *             | 0.131         | 0.02 *              | 0.271         |
|                          | Urine  | 0.091               | 0.155         | 0.103               | 0.009 *       |
| Substance P              | Urine  | 0.077               | 0.252         | 0.845               | 0.594         |
| <b>Thromboxane B2</b>    | Serum  | 0.014 *             | 0.147         | 0.095               | 0.153         |
|                          | Urine  | 0.053               | 0.422         | 0.072               | 0.944         |
| TNF RII                  | Serum  | 0.271               | 0.38          | 0.083               | 0.064         |

\* Biomarkers with a  $p < 0.05$ ; \*\* Biomarkers with a  $p < 0.01$

Supplementary Table S1b. Mann-Whitney U test and Levene's test results for case vs control and men vs woman.

| Biomarkers              | Matrix | <i>p</i> value          |               |                      |               |
|-------------------------|--------|-------------------------|---------------|----------------------|---------------|
|                         |        | Case vs control (N=400) |               | Men vs woman (N=400) |               |
|                         |        | Mann-Whitney U test     | Levene's test | Mann-Whitney U test  | Levene's test |
| Aldosterone             | Urine  | 0.356                   | 0.863         | 3.89E-11 ***         | 5.02E-07 ***  |
| $\alpha$ 1 anti-trypsin | Serum  | 0.084                   | 0.054         | 2.006E-07 ***        | 0.131         |
|                         | Urine  | 0.661                   | 0.196         | 0.013                | 0.661         |
| Apolipoprotein A1       | Serum  | 0.325                   | 0.137         | 4.621E-11 ***        | 0.036 *       |
| BDNF free               | Serum  | 0.095                   | 0.069         | 0.623                | 0.567         |
| BDNF total              | Serum  | 0.084                   | 0.104         | 0.574                | 0.025*        |
| Calprotectin            | Serum  | 1.41E-05 ***            | 0.039 *       | 0.167                | 0.606         |
|                         | Urine  | 0.088                   | 0.055         | 0 ***                | 7.525E-08 *** |
| cGMP                    | Urine  | 0.018*                  | 0.179         | 0 ***                | 9.604E-07 *** |
| Cortisol                | Serum  | 0.976                   | 0.047 *       | 0.045 *              | 0.017 *       |
|                         | Urine  | 0.121                   | 0.481         | 8.189E-06 ***        | 0.083         |
| EGF                     | Serum  | 0.006 **                | 0.177         | 0.283                | 0.829         |
| Endothelin              | Serum  | 0.396                   | 0.581         | 0.01 *               | 0.336         |
| HVEM                    | Urine  | 2.81E-07 ***            | 0.005 **      | 2.58E-08 ***         | 0.045 *       |
| Isoprostane             | Urine  | 0.001 **                | 0.138         | 0.291                | 0.018 *       |
| Leptin                  | Serum  | 0.084                   | 0.003 **      | 0 ***                | 1.588E-14 *** |
|                         | Urine  | 0.121                   | 0.216         | 0 ***                | 6.148E-06 *** |
| LTB4                    | Urine  | 0.125                   | 0.071         | 0.057                | 0.102         |
| Midkine                 | Urine  | 0.911                   | 0.921         | 3.594E-07 ***        | 0.026 *       |
| Myeloperoxidase         | Serum  | 0.013 *                 | 0.089         | 0.47                 | 0.477         |
|                         | Urine  | 0.087                   | 0.107         | 0 ***                | 0.001 **      |
| Prolactin               | Serum  | 0.024 *                 | 0.725         | 3.334E-06 ***        | 0.005 **      |
| Resistin                | Serum  | 0.001 **                | 0.963         | 1.186E-06 ***        | 0.013 *       |
|                         | Urine  | 0.028 *                 | 0.005 **      | 2.402E-07 ***        | 0.001 **      |
| Substance P             | Urine  | 0.189                   | 0.286         | 0.004 **             | 0.212         |
| Thromboxane B2          | Serum  | 0.556                   | 0.934         | 0.524                | 0.93          |
|                         | Urine  | 0.009 **                | 0.599         | 0.806                | 0.573         |
| TNF RII                 | Serum  | 0.045 *                 | 0.075         | 0.016 *              | 0.138         |

\* Biomarkers with a  $p < 0.05$ ; \*\* Biomarkers with a  $p < 0.01$ ; \*\*\* Biomarkers with a  $p < 0.0001$
