# Supplementary material for: Gender Differences in Developing Biomarker-Based Major Depressive Disorder Diagnostics
Source: Int J Mol Sci. 2020 Apr 25;21(9):3039. doi: 10.3390/ijms21093039 (PMC7246841; doi:10.3390/ijms21093039)
Supplement: Supplementary file 1 [file ijms-21-03039-s001.zip › Table S3 Comparison of results with and without gender separation within new cohort .pdf]

Table S3 Comparison of results with and without gender separation within new cohort

|          |          | QBP                 |                   | 5-fold cross-validation |                   |
|----------|----------|---------------------|-------------------|-------------------------|-------------------|
|          |          | AUC <sub>real</sub> | spec. at 75% sens | AUC <sub>testing</sub>  | spec. at 75% sens |
| All Ethn | Combined | 0.842               | 82%               | 0.810                   | 71%               |
|          | Female   | 0.862               | 90%               | 0.835                   | 77%               |
|          | Male     | 0.898               | 93%               | 0.867                   | 81%               |
| Cauc     | Combined | 0.845               | 82%               | 0.825                   | 77%               |
|          | Female   | 0.905               | 91%               | 0.846                   | 81%               |
|          | Male     | 0.891               | 92%               | 0.837                   | 74%               |
